# Supplementary material for: MiR-495 inhibits esophageal squamous cell carcinoma progression by targeting Akt1
Source: PubMed Central journal article supplement (PMC5239471; doi:10.18632/oncotarget.9981), 2016-06-13
Supplement: oncotarget-07-51223-s001.pdf [file oncotarget-07-51223-s001.pdf]

## MiR-495 inhibits esophageal squamous cell carcinoma progression by targeting Akt1

### Supplementary Materials

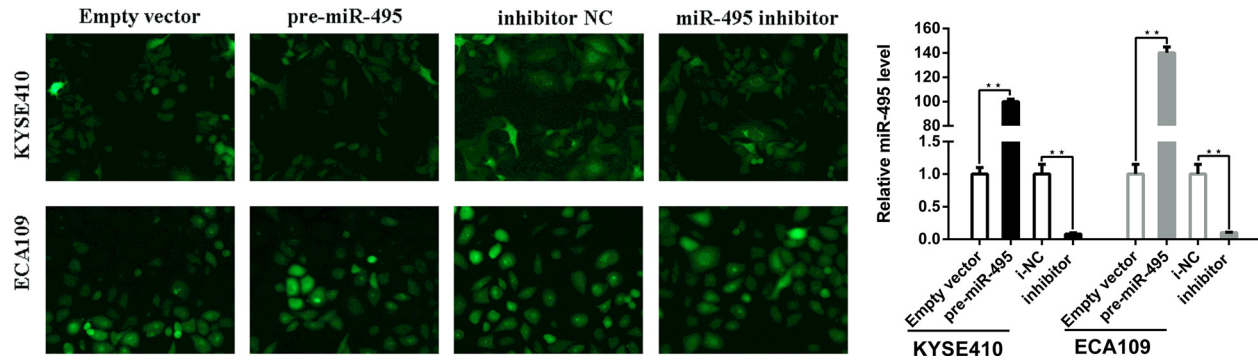

**Supplementary Figure S1: Transfection efficiency of miR-495 mimics or inhibitors.** Representative images (left) and quantification (right) of miR-495 transfection efficiency. Intracellular miR-495 levels increased dramatically in cell lines transfected with mimics and decreased dramatically in cell lines transfected with inhibitors.
